# Supplementary material for: The AtHSP17.4C1 Gene Expression Is Mediated by Diverse Signals that Link Biotic and Abiotic Stress Factors with ROS and Can Be a Useful Molecular Marker for Oxidative Stress
Source: MDPI journal article supplement (doi:10.3390/ijms20133201), 2019-06-29
Supplement: s1 [file s1]

Table S1. List of Arabidopsis genes (36 genes) annotated as small heat shock proteins (sHSPs) or HSP20-like chaperones and their expression responses to stress treatments.

| Gene locus | Gene name                  | Expression levels (Log FC) under stress treatments |         |      |          |                               |      | Localization                                     |
|------------|----------------------------|----------------------------------------------------|---------|------|----------|-------------------------------|------|--------------------------------------------------|
|            |                            | Heat                                               | Drought | Salt | Multiple | H <sub>2</sub> O <sub>2</sub> | MV   |                                                  |
| AT3G46230  | HSP17.4CI                  | 6.12                                               | 1.50    | 2.00 | 7.16     | 3.52                          | 4.28 | Cytoplasm                                        |
| AT1G53540  | HSP17.6C                   | 9.08                                               | 1.50    | 3.14 | 10.18    | 4.08                          | 3.07 | Cytoplasm                                        |
| AT5G12030  | HSP17.6A                   | 8.72                                               | -       | 2.89 | 9.21     | 3.70                          | 5.21 | Cytoplasm                                        |
| AT5G12020  | HSP17.6                    | 7.53                                               | -       | 1.97 | 8.22     | 4.89                          | 4.04 | Cytoplasm                                        |
| AT5G51440  | HSP23.5                    | 6.34                                               | -       | 1.50 | 6.73     | 3.64                          | 2.02 | Mitochondrion                                    |
| AT2G29500  | HSP17.6B                   | 5.76                                               | -       | -    | 7.23     | 4.23                          | 4.48 | Cytoplasm                                        |
| AT1G59860  | HSP17.6A                   | 4.52                                               | -       | -    | 5.06     | 4.73                          | 4.63 | Cytoplasm                                        |
| AT1G54050  | HSP17.4B                   | 2.44                                               | -       | -    | 3.03     | 3.64                          | 4.08 | Cytoplasm                                        |
| AT5G37670  | HSP15.7                    | 2.71                                               | -       | -    | 2.95     | 2.85                          | 1.85 | Peroxisome                                       |
| AT4G10250  | HSP22.0                    | 8.33                                               | -       | -    | 10.17    | 1.53                          | -    | ER                                               |
| AT4G27670  | HSP21                      | 8.02                                               | -       | -    | 10.04    | 1.61                          | -    | Chloroplast                                      |
| AT4G25200  | HSP23.6                    | 11.23                                              | -       | 2.73 | 12.12    | -                             | -    | Mitochondrion                                    |
| AT1G07400  | HSP17.8                    | 5.96                                               | -       | 1.50 | 6.91     | -                             | -    | Cytoplasm                                        |
| AT2G19310  | HSP18.5                    | 3.47                                               | -       | -    | 3.37     | -                             | -    | Cytoplasm                                        |
| AT1G52560  | HSP26.5                    | 2.40                                               | -       | -    | 5.12     | -                             | -    | Mitochondrion                                    |
| AT5G59720  | HSP18.2                    | 1.99                                               | -       | -    | 3.98     | -                             | -    | Cytoplasm                                        |
| AT4G16550  | HSP20-like chaperone       | 1.60                                               | 2.17    | 1.50 | 1.82     | -                             | -    | Unknown                                          |
| AT4G21870  | HSP20-like chaperone       | -                                                  | -       | -    | -2.32    | -                             | -    | Cytoplasm                                        |
| AT1G76770  | HSP20-like chaperone       | -1.79                                              | -       | -    | -        | -                             | -    | Cytoplasm                                        |
| AT5G54660  | HSP21.7                    | -                                                  | -       | -    | -        | -                             | -    | Cytoplasm                                        |
| AT5G47600  | HSP14.7                    | -                                                  | -       | -    | -        | -                             | -    | Cytoplasm                                        |
| AT2G37570  | HSP20-like chaperone, SLT1 | -                                                  | -       | -    | -        | -                             | -    | Mitochondrion                                    |
| AT5G53400  | HSP20-like chaperone, BOB1 | -                                                  | -       | -    | -        | -                             | -    | Cytoplasm                                        |
| AT5G58740  | HSP20-like chaperone       | -                                                  | -       | -    | -        | -                             | -    | Cytoplasm                                        |
| AT4G27890  | HSP20-like chaperone, BOB2 | -                                                  | -       | -    | -        | -                             | -    | Cytoplasm                                        |
| AT4G02450  | Co-chaperone protein p23-1 | -                                                  | -       | -    | -        | -                             | -    | Cytoplasm, nucleus, plasma membrane, plasmodesma |

|           |                                |   |   |   |   |   |   |                                                        |
|-----------|--------------------------------|---|---|---|---|---|---|--------------------------------------------------------|
| AT1G54400 | HSP20-like chaperone           | - | - | - | - | - | - | Cytoplasm, integral component of membrane              |
| AT5G20970 | HSP20-like chaperone           | - | - | - | - | - | - | Cytoplasm, integral component of membrane              |
| AT2G27140 | Heat shock family protein      | - | - | - | - | - | - | Cytoplasm, integral component of membrane              |
| AT3G10680 | HSP20-like chaperone           | - | - | - | - | - | - | Cell wall, sieve plate, integral component of membrane |
| AT3G03773 | Co-chaperone protein p23-2     | - | - | - | - | - | - | Cytoplasm, nucleus                                     |
| AT1G54840 | HSP20-like chaperone, IDM2     | - | - | - | - | - | - | Nucleoplasm, nucleus                                   |
| AT1G76780 | HSP20-like chaperone           | - | - | - | - | - | - | Integral component of membrane                         |
| AT2G03020 | HSP20/alpha crystalline family | - | - | - | - | - | - | Cytoplasm                                              |
| AT4G16540 | HSP20/alpha crystalline family | - | - | - | - | - | - | Chloroplast, cytoplasm                                 |
| AT5G47590 | HSP20/alpha crystalline family | - | - | - | - | - | - | Cytoplasm                                              |

Data for heat (35 °C, 4 h), drought (imposed by mannitol, 200 mM, 16 h), salt (NaCl, 150 mM, 16 h) and multiple (a combination of the previous three stresses), was adopted from our previous work [42], genes that showed Log FC of more than one, considered induced genes. For H<sub>2</sub>O<sub>2</sub> (20 mM, 1 h) and MV (methyl viologen, 50 µM, 2 h), data was quoted from [52]. and [16], respectively. Expression values with Log FC (fold change) of 1.5 or more compared to controls were considered. The hyphen “-“ means not responsive. The gene names and their subcellular locations were quoted from Uniprot (<https://www.uniprot.org/>) and The Arabidopsis Information Resource (TAIR) (<https://www.arabidopsis.org/index.jsp>) websites. All shown values were significantly different at p< 0.05. Genes on the list were ordered where genes induced by both abiotic and oxidative stresses come first, then by the level of induction by heat, with the investigated gene, *HSP17.4CI*, on the top.
